# Supplementary material
Source: PubMed Central journal article supplement (PMC3518129)
Supplement: supp_M112.018374_mcp.M112.018374-2.pdf [file supp_M112.018374_mcp.M112.018374-2.pdf]

| A     |      |      |      |      |      |      |      |      |      |       |       |       | B     |      |      |      |      |      |      |      |      |       |       |       | C     |       |      |      |      |      |      |      |      |       |       |       |   |   |
|-------|------|------|------|------|------|------|------|------|------|-------|-------|-------|-------|------|------|------|------|------|------|------|------|-------|-------|-------|-------|-------|------|------|------|------|------|------|------|-------|-------|-------|---|---|
|       | Rbd1 | Rbd2 | Rbd3 | Rbd4 | Rbd5 | Rbd6 | Rbd7 | Rbd8 | Rbd9 | Rbd10 | Rbd11 | Rbd12 | Rbd1  | Rbd2 | Rbd3 | Rbd4 | Rbd5 | Rbd6 | Rbd7 | Rbd8 | Rbd9 | Rbd10 | Rbd11 | Rbd12 | Rbd1  | Rbd2  | Rbd3 | Rbd4 | Rbd5 | Rbd6 | Rbd7 | Rbd8 | Rbd9 | Rbd10 | Rbd11 | Rbd12 |   |   |
| Rbd1  | -    | 9271 | 361  | 65   | 2068 | 1948 | 571  | 1427 | 1497 | 0     | 933   | 0     | Rbd1  | -    | 1    | 1    | 0    | 1    | 1    | 1    | 1    | 1     | 0     | 1     | 0     | Rbd1  | -    | 14   | 0    | 3    | 6    | 8    | 1    | 0     | 2     | 0     | 4 | 0 |
| Rbd2  | 9271 | -    | 1710 | 125  | 46   | 92   | 114  | 5    | 1381 | 1507  | 420   | 999   | Rbd2  | 1    | -    | 1    | 0    | 0    | 0    | 0    | 0    | 0     | 1     | 1     | 1     | Rbd2  | 14   | -    | 2    | 1    | 0    | 0    | 0    | 0     | 0     | 3     | 0 | 3 |
| Rbd3  | 361  | 1710 | -    | 0    | 0    | 0    | 0    | 171  | 0    | 1084  | 2043  | 587   | Rbd3  | 1    | 1    | -    | 0    | 0    | 0    | 0    | 0    | 0     | 1     | 1     | 1     | Rbd3  | 0    | 2    | -    | 0    | 0    | 0    | 0    | 0     | 0     | 4     | 1 | 2 |
| Rbd4  | 65   | 125  | 0    | -    | 0    | 0    | 2135 | 0    | 0    | 0     | 0     | 0     | Rbd4  | 0    | 0    | 0    | -    | 0    | 0    | 1    | 0    | 0     | 0     | 0     | 0     | Rbd4  | 3    | 1    | 0    | -    | 2    | 1    | 2    | 0     | 0     | 0     | 0 | 0 |
| Rbd5  | 2068 | 46   | 0    | 0    | -    | 130  | 0    | 0    | 0    | 0     | 0     | 0     | Rbd5  | 1    | 0    | 0    | 0    | -    | 0    | 0    | 0    | 0     | 0     | 0     | 0     | Rbd5  | 6    | 0    | 0    | 2    | -    | 5    | 0    | 0     | 0     | 0     | 0 | 0 |
| Rbd6  | 1948 | 92   | 0    | 0    | 130  | -    | 462  | 0    | 0    | 0     | 0     | 0     | Rbd6  | 1    | 0    | 0    | 0    | 0    | -    | 1    | 0    | 0     | 0     | 0     | 0     | Rbd6  | 8    | 0    | 0    | 1    | 5    | -    | 1    | 0     | 0     | 0     | 0 | 0 |
| Rbd7  | 571  | 114  | 0    | 2135 | 0    | 462  | -    | 0    | 0    | 0     | 0     | 0     | Rbd7  | 1    | 0    | 0    | 1    | 0    | 1    | -    | 0    | 0     | 0     | 0     | 0     | Rbd7  | 1    | 0    | 0    | 2    | 0    | 1    | -    | 0     | 0     | 0     | 0 | 0 |
| Rbd8  | 1427 | 5    | 171  | 0    | 0    | 0    | 0    | -    | 0    | 0     | 188   | 0     | Rbd8  | 1    | 0    | 0    | 0    | 0    | 0    | 0    | 0    | -     | 0     | 0     | 0     | Rbd8  | 0    | 0    | 0    | 0    | 0    | 0    | 0    | -     | 0     | 0     | 0 | 0 |
| Rbd9  | 1497 | 1381 | 0    | 0    | 0    | 0    | 0    | 0    | -    | 0     | 0     | 0     | Rbd9  | 1    | 1    | 0    | 0    | 0    | 0    | 0    | 0    | 0     | -     | 0     | 0     | Rbd9  | 2    | 0    | 0    | 0    | 0    | 0    | 0    | 0     | 0     | -     | 0 | 0 |
| Rbd10 | 0    | 1507 | 1084 | 0    | 0    | 0    | 0    | 0    | 0    | -     | 0     | 74    | Rbd10 | 0    | 1    | 1    | 0    | 0    | 0    | 0    | 0    | 0     | 0     | -     | 0     | Rbd10 | 0    | 3    | 4    | 0    | 0    | 0    | 0    | 0     | 0     | -     | 0 | 0 |
| Rbd11 | 933  | 420  | 2043 | 0    | 0    | 0    | 0    | 188  | 0    | 0     | -     | 14    | Rbd11 | 1    | 1    | 1    | 0    | 0    | 0    | 0    | 0    | 0     | 0     | -     | 0     | Rbd11 | 4    | 0    | 1    | 0    | 0    | 0    | 0    | 0     | 0     | 0     | - | 0 |
| Rbd12 | 0    | 999  | 587  | 0    | 0    | 0    | 0    | 0    | 0    | 74    | 14    | -     | Rbd12 | 0    | 1    | 1    | 0    | 0    | 0    | 0    | 0    | 0     | 0     | -     | Rbd12 | 0     | 3    | 2    | 0    | 0    | 0    | 0    | 0    | 0     | 0     | 0     | 0 | - |

**Supplemental Figure 2.** Defining adjacency of interacting yeast RNAP subunits in PDB 1WCM from cross-links identified by Chen et al. (24). Summary of data calculated from known crystal structure and reported cross-link data RNA Polymerase II complex (24). A, the size of the intersubunit interface (in  $\text{\AA}^2$ ) for each pair of subunits in the experimental structure of the twelve subunit RNA polymerase II structure complex (PDB 1WCM). The interface area for a pair of subunits is calculated using the solvent accessible surface area (SASA) of the monomers and the dimer by:  $[(\text{SASA}(\text{A})+\text{SASA}(\text{B}))-\text{SASA}(\text{AB})]/2$ . B, topology matrix calculated using a threshold of  $250 \text{\AA}^2$  to define adjacency (note that this matrix is equivalent to a graph structure). C, observed unique lysine-lysine interlinks for RNAPII complex (24). Using the adjacency matrix in panel B, 53 of 65 cross-links is determined to come from adjacent pairs corresponding to an estimate of  $p = 0.82$ .

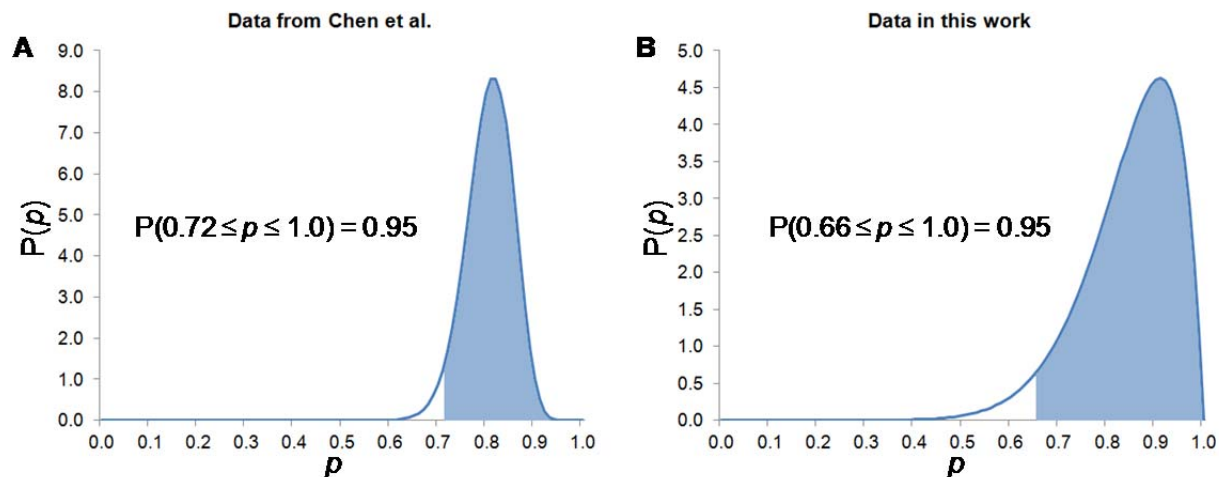

**Supplementary Figure 3.** Determining the optimal p-value for use in modeling of the 19S topology. A-B, probability density functions (PDF) and confidence intervals for the global parameter  $p$ . Probability density function and the associated confidence interval were calculated using cross-linking data from RNAPII (24) in panel A and the 19S ATPase base ring in this work in panel B. For both datasets the number of unique lysine-lysine interlinks were used. A, twelve subunit experimental structure of RNAPII – with subunit adjacency defined by a shared interface of at least  $250 \text{ \AA}^2$  (Supplemental Figure 2), the published crosslink data from Chen et al. (24) results in an observed count of 53/65 cross-links coming from adjacent subunits. B, the 19S RP base hexamer under the assumption that the proposed base subunit ordering is correct; the observed count of 10/11 is used to parameterize the beta distribution and generate the PDF and confidence intervals.

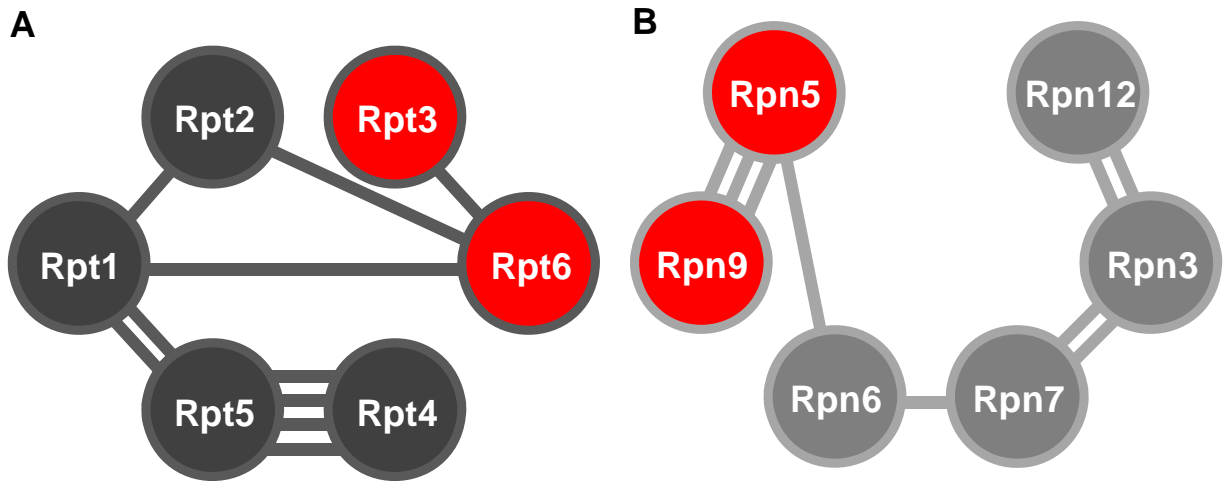

**Supplemental Figure 4.** The second most likely ( $G_{ML2}$ ) ordering for the ATPase base heterohexamer (A) and the PCI domain-containing heterohexamer (B). A, the  $G_{ML2}$  graph for the base ring has only a single ordering as Rpt1-2-3-6-4-5, corresponding to a switch of subunits Rpt3 and Rpt6 with respect to  $G_{ML}$  (Rpt 1-2-6-3-4-5). This  $G_{ML2}$  ordering results in violations of two cross-link constraints: Rpt2-6 and Rpt1-6. B, throughout the range of  $p$  values, there are six possible orderings of PCI domain-containing hexamer representing the  $G_{ML2}$  graph, i.e. Rpn5-9-6-7-3-12 (*shown above*), Rpn9-5-6-12-3-7, Rpn9-5-12-3-7-6, Rpn5-9-12-3-7-6, Rpn6-5-9-7-3-12, and Rpn6-5-9-12-3-7. In comparison to the  $G_{ML}$  ordering (Rpn9-5-6-7-3-12) which does not have any constraint violation, each of these  $G_{ML2}$  graph violates one cross-link constraint: Rpn5-6 or Rpn6-7 (subunits underlined above). The unique lysine-lysine linkages between subunits are shown.

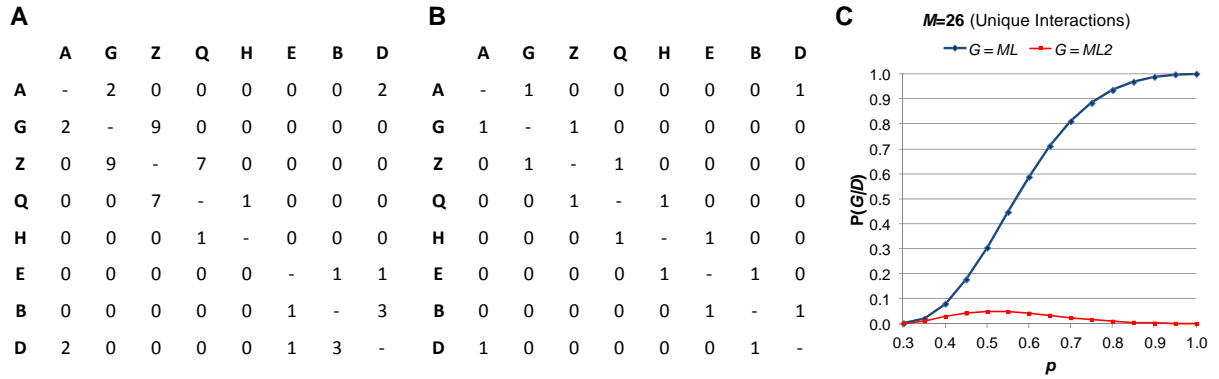

**Supplementary Figure 5.** Probabilistic analysis of cross-linking data obtained from eukaryotic TRiC/CCT chaperonin complex by Kalisman et al. (45). A, counts of unique intersubunit cross-links obtained from Supplemental Table S1 from Kalisman et al. 2012. B, graph structure proposed in Kalisman et al. 2012, which matches the maximum likelihood graph ( $G_{ML}$ ) from our probabilistic analysis. C, plot of the probability of  $G_{ML}$  and  $G_{ML2}$  as a function of the global parameter  $p$ . Note that while the combinatorial homology modeling approach of Kalisman et al. 2012 depends on homology models of each subunit, our approach is more general and can be applied in the absence of any structural information for individual subunits.
